# Supplementary material for: Characterization of submicron particles by time-of-flight aerosol chemical speciation monitor (ToF-ACSM) during wintertime: aerosol composition, sources, and chemical processes in Guangzhou, China
Source: Copernicus journal article supplement (doi:10.5194/acp-20-7595-2020), 2020-07-01
Supplement: Supplementary file 1 [file acp-20-7595-2020-supplement.pdf]

Supplement of Atmos. Chem. Phys., 20, 7595–7615, 2020  
<https://doi.org/10.5194/acp-20-7595-2020-supplement>  
© Author(s) 2020. This work is distributed under  
the Creative Commons Attribution 4.0 License.

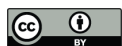

*Supplement of*

## **Characterization of submicron particles by time-of-flight aerosol chemical speciation monitor (ToF-ACSM) during wintertime: aerosol composition, sources, and chemical processes in Guangzhou, China**

**Junchen Guo et al.**

*Correspondence to:* Shengzhen Zhou (zhoushzh3@mail.sysu.edu.cn) and Jun Zhao (zhaojun23@mail.sysu.edu.cn)

The copyright of individual parts of the supplement might differ from the CC BY 4.0 License.

**Table S1.** Chemical composition of NR-PM<sub>1</sub> in the Pearl River Delta (PRD) region

| Location | time        | NR-PM <sub>1</sub> ( $\mu\text{g m}^{-3}$ ) | OA (%) | SO <sub>4</sub> <sup>2-</sup> (%) | NO <sub>3</sub> <sup>-</sup> (%) | NH <sub>4</sub> <sup>+</sup> (%) | Cl <sup>-</sup> (%) |
|----------|-------------|---------------------------------------------|--------|-----------------------------------|----------------------------------|----------------------------------|---------------------|
| Panyu    | winter.2014 | 55.4                                        | 50.5   | 25.2                              | 12.2                             | 9.9                              | 2.1                 |
| Shenzhen | winter.2009 | 44.5                                        | 46.2   | 28.5                              | 11.6                             | 11.9                             | 1.9                 |
| Kaiping  | winter.2008 | 33.1                                        | 36.3   | 36.0                              | 11.5                             | 15.0                             | 1.2                 |
| Guanzhou | winter.2017 | 35.3                                        | 49.0   | 20.0                              | 17.0                             | 13.0                             | 1.0                 |

**Table S2.** OA compositions in the PRD region

| Location  | time        | OA ( $\mu\text{g m}^{-3}$ ) | OA compositions                                          |
|-----------|-------------|-----------------------------|----------------------------------------------------------|
| Panyu     | Winter 2014 | 25.6                        | HOA (26%), COA (8%), BBOA (4%), SVOOA (32%), LVOOA (29%) |
| Shenzhen  | Winter 2009 | 20.47                       | HOA (29.5%), BBOA (24.1%), SVOOA (27.6%), LVOOA (18.8%)  |
| Kaiping   | Winter 2008 | 11.92                       | BBOA (24.5%), SVOOA (35.8%), LVOOA (39.6%)               |
| Guangzhou | Winter 2017 | 17.3                        | HOA (13%), COA (18%), SVOOA (30%), LVOOA (40%)           |

**Table S3.** P-value, T-value, number of points (n), and Pearson Correlations between SOA and RO<sub>2</sub>\* for different NR-PM<sub>1</sub> concentration intervals.

| NR-PM <sub>1</sub> ( $\mu\text{g m}^{-3}$ ) | r    | n  | T    | p      |
|---------------------------------------------|------|----|------|--------|
| < 30                                        | 0.31 | 47 | 5.07 | <0.001 |
| 30-40                                       | 0.50 | 60 | 4.40 | <0.001 |
| 40-50                                       | 0.53 | 35 | 3.56 | 0.0012 |
| 50-60                                       | 0.49 | 41 | 3.51 | 0.0011 |
| 60-70                                       | 0.62 | 40 | 4.93 | <0.001 |
| >70                                         | 0.59 | 30 | 3.85 | <0.001 |

## Figures

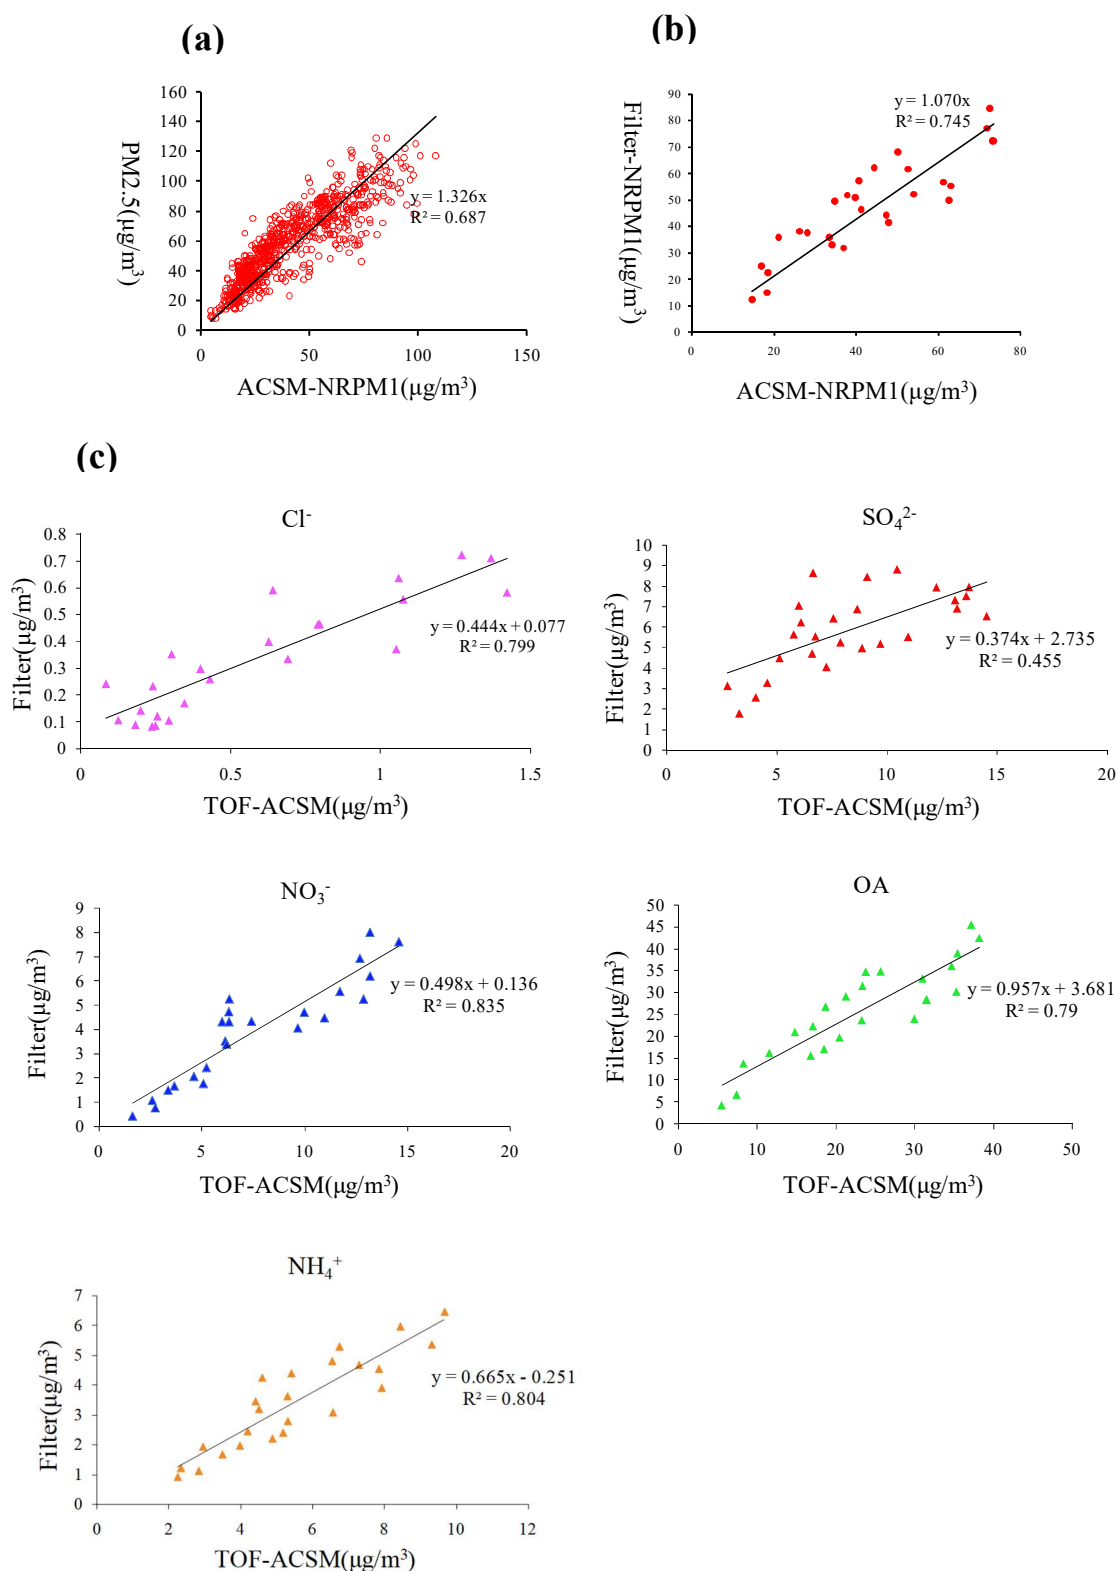

**Figure S1.** Comparisons between measurements by ToF-ACSM and those by BAM-1020 (PM<sub>2.5</sub>) and filter method: (a) NR-PM<sub>1</sub> mass concentration measured by ToF-ACSM vs. PM<sub>2.5</sub> mass concentration measured by BAM-1020; (b) NR-PM<sub>1</sub> concentration measured by ToF-ACSM vs. NR-PM<sub>1</sub> concentration based on filter (sum of sulfate, nitrate, ammonium, chloride and 1.6 times of OC); (c) Comparison of filter based measurements for concentration of NR-PM<sub>1</sub> species (sulfate, nitrate, ammonium, chloride and OA) with the concentration of the corresponding NR-PM<sub>1</sub> components measured by ToF-ACSM. OA from filter data is calculated to be 1.6 times OC.

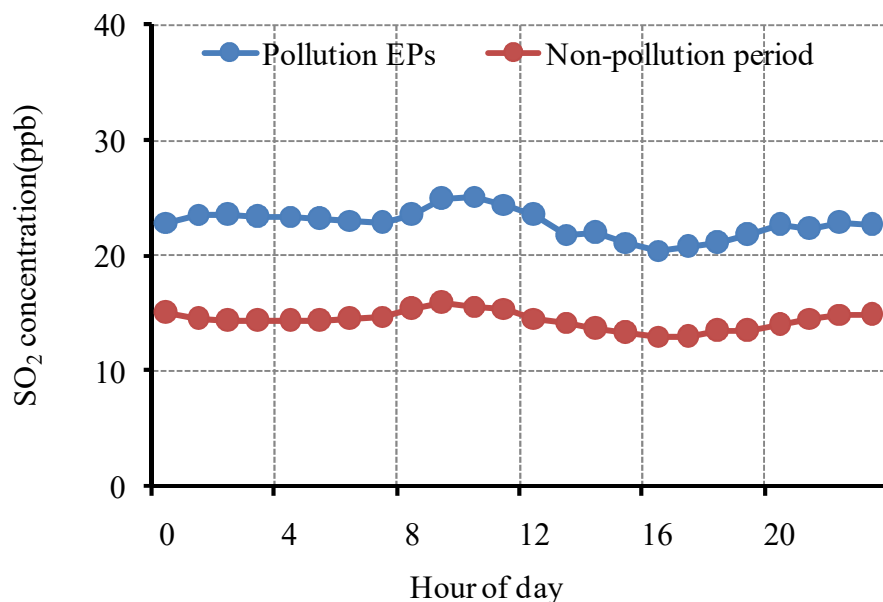

Figure S2. Diurnal profiles of SO<sub>2</sub> concentration for non-pollution period (red line) and pollution EPs (blue line).

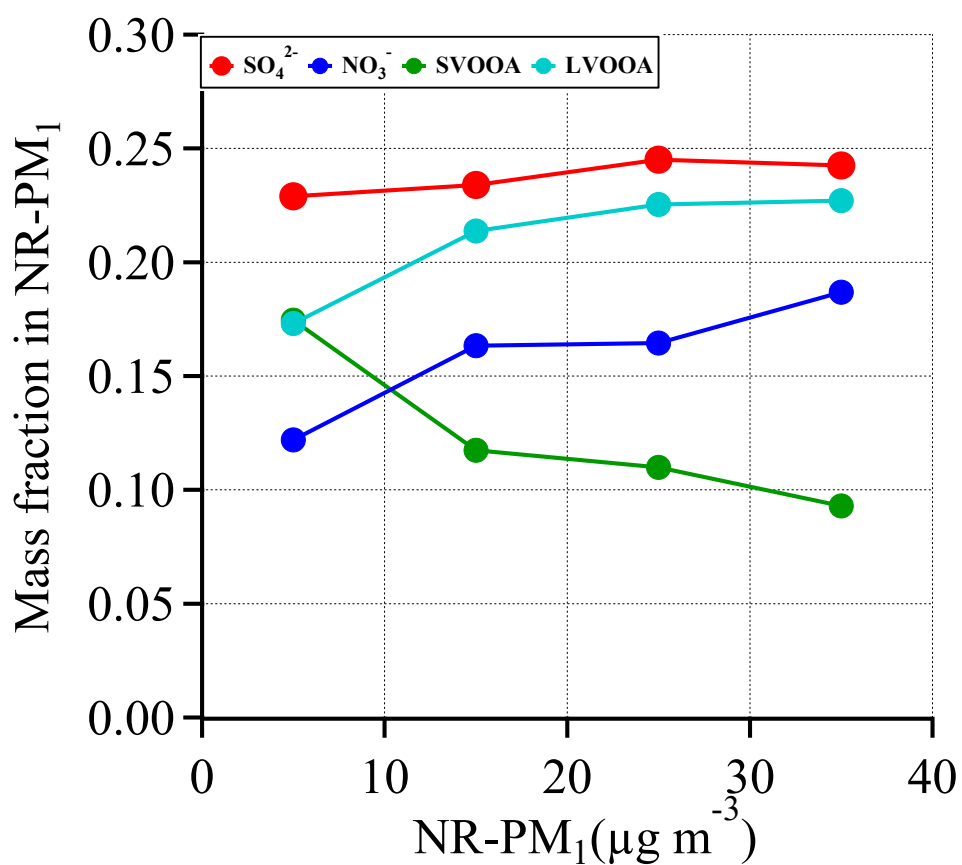

Figure S3. Evolution of SPM species fractions with concentration of NR-PM<sub>1</sub> for non-pollution period.

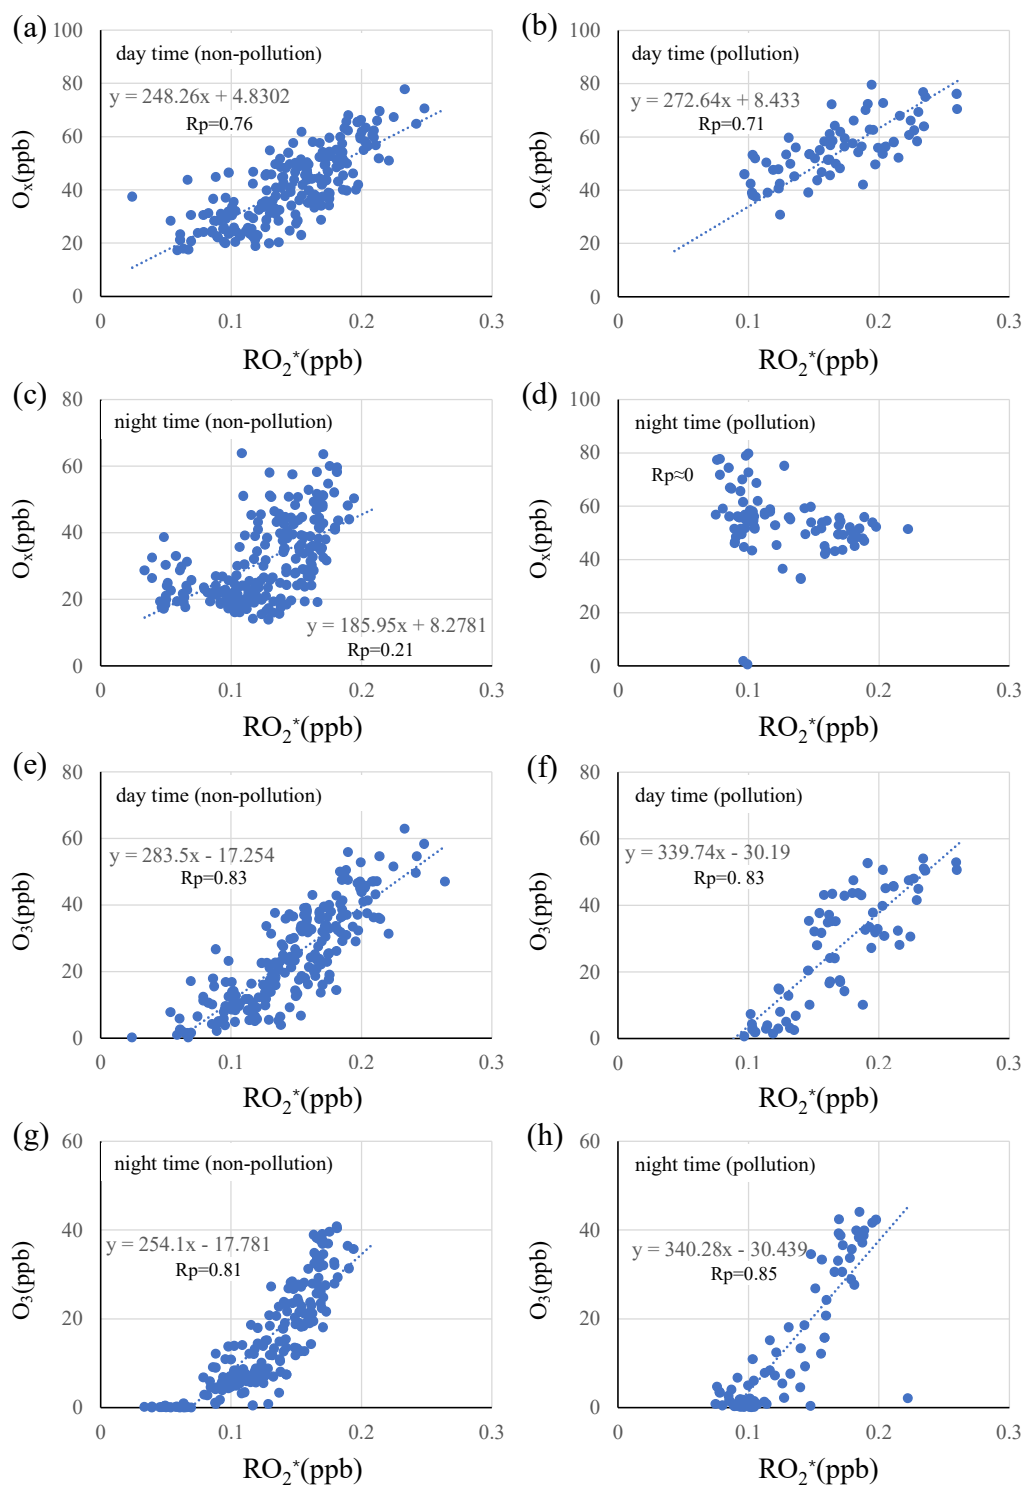

**Figure S4.** Dependence of O<sub>x</sub> and O<sub>3</sub> on RO<sub>2</sub>\* for different scenarios (non-pollution daytime period, pollution daytime EPs, non-pollution nighttime period, and pollution nighttime EPs). All the regressions are orthogonally linear.

## Methods

OA components were deconvolved through an improved source apportionment technology called Multilinear Engine (ME-2) developed from Positive Matrix Factorization (PMF) and running on an igor-based interface (SoFi). Compared to traditional PMF, ME-2 offers a so-called a-value approach (Canonaco et al., 2013) using user defined external profiles or time series to constrain F (factor profile matrix) and G (concentration time series matrix) defined in model with a variable range (a value), which can be described as follows:

$$f_{j,solution} = f_{j,external} \pm a \cdot f_{j,external} \quad (1)$$

$$g_{i,solution} = g_{i,external} \pm a \cdot g_{i,external} \quad (2)$$

where  $f_j$  and  $g_i$  represent row and column of the matrices F and G, respectively. The index j varies between 0 and the number of variables and i varies between 0 and the number of measured points. Therefore, more efficient searches of solution space and a more objective choice of optimal solution are solved through the recently developed algorithm. Similar to many previous studies, ions with m/z beyond 120 were removed from ME-2 input matrix due to obviously low signal-to-noise ratios. We firstly performed totally unconstrained runs (i.e., PMF), with a possible factor number in a range of 2-10. The optimal number of factors should be chosen based on the value of  $Q/Q_{expected}$ , rationality of factor profile, and correlation between the time series of deconvolved factors and the corresponding external tracers (Ulbrich et al., 2009; Zhang et al., 2011). The value of  $Q/Q_{expected}$  decreased with increase of factor number but this tendency was obviously damped for a factor number larger than 2, which means factor number should be larger than 2. However, we found that solutions with factor number  $\geq 5$  showed over-split factors without an explicit physical meaning while 3-factor solution was obviously mixed. Hence, it turned out that the 4-factor solution had relatively reasonable profiles and time series under a fully unconstrained condition. Although the unconstrained 4-factor solution was overall reasonable, defects existed from the uncertainty of measured data and traditional PMF algorithm. For instant, the diurnal time series of HOA and COA concentrations exhibited a slight mis-deconvolution which showed an extremely weak peak for COA and a fake peak for HOA at noon. In addition, the profile of HOA showed considerably smaller proportions of  $f_{55}$  and  $f_{57}$  than previous studies in both laboratory and field studies. Similar findings were reported in previous studies (Zhang et al., 2012; Qin et al., 2017). The a-value approach offers additional limits for rotational ambiguity through introducing user defined external factor profiles (Paatero et al., 2009; Cheng et al., 2013), which has been proven to be an efficient way to remedy these mis-deconvolution from PMF (Qin et al., 2017). Thus, we further constrained one of four factors with a standard HOA profile derived from the average PMF-resolved HOA factors from measurements carried out in 15 megacities similar to Guangzhou (Ng et al., 2011) with an a-value chosen to be 0.3, 0.5 and 0.7 respectively to explore the improved solution. The results showed that an unreasonably high proportion of m/z 44 were presented in COA profiles for solutions with an a-value of 0.5 and 0.7. We hence adopt 4 factors and an a-value of 0.3 as the optimal solution. The results from ME-2 are shown in Figures S5~S11, and Figures S16-S17.

## PMF results

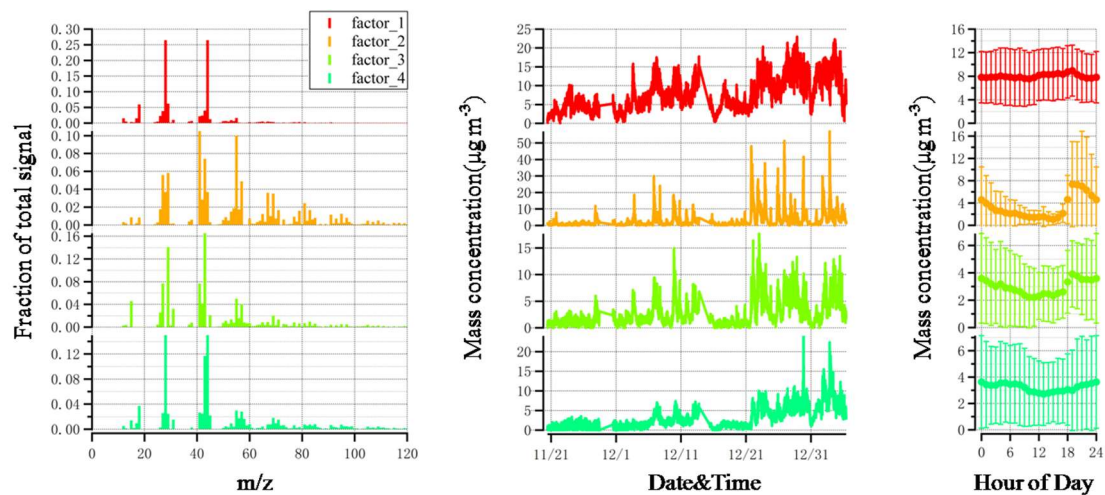

Figure S5. Results from the 4-factor solution of PMF.

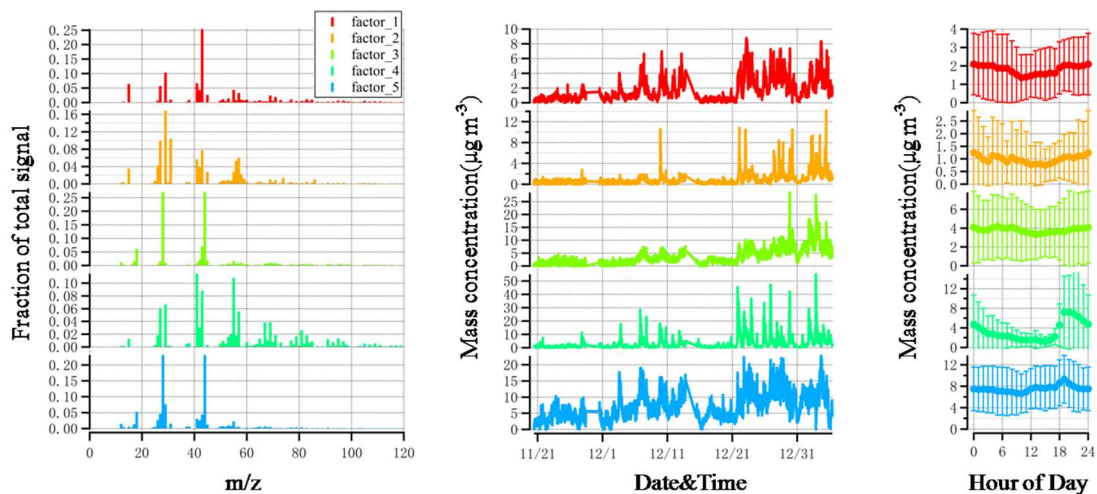

Figure S6. Results from the 5-factor solution of PMF.

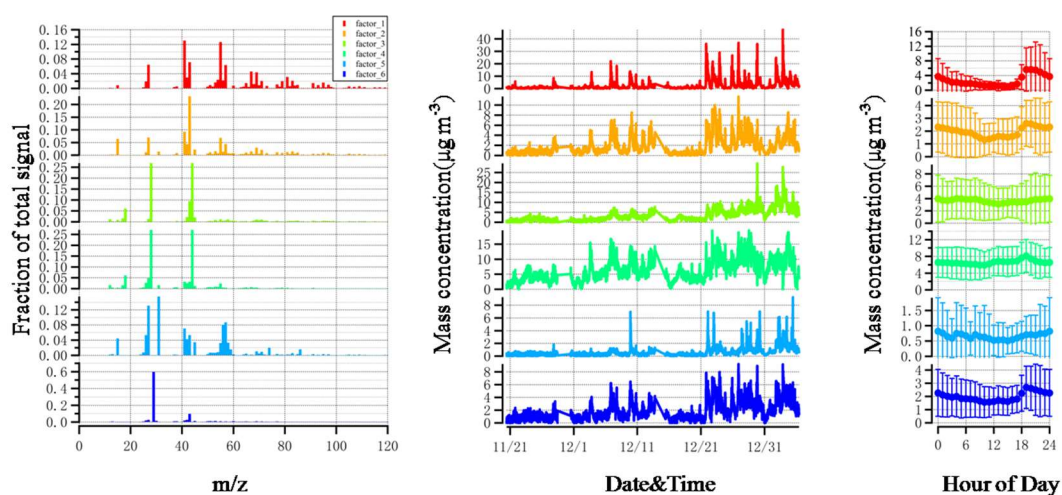

Figure S7. Results from the 6-factor solution of PMF.



## a-value results (4 factors)

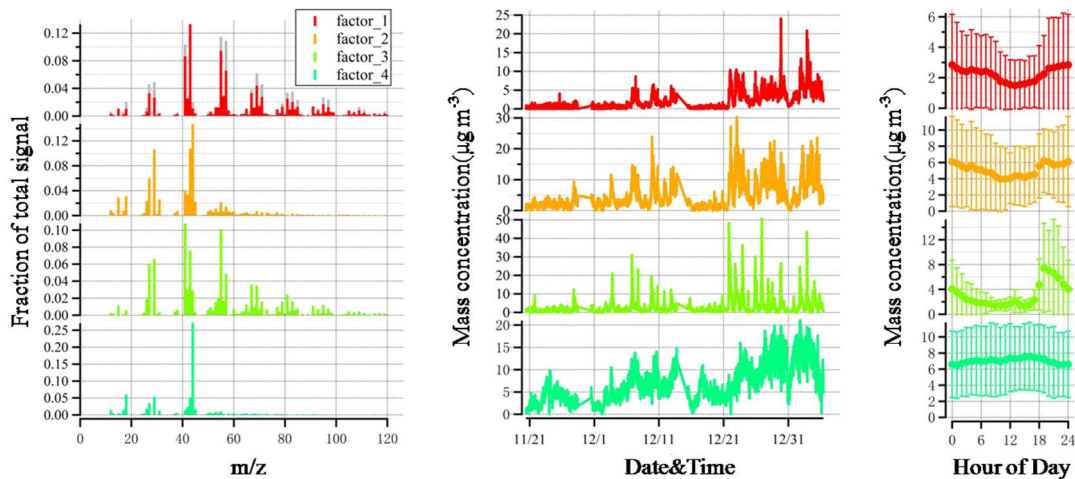

Figure S8. Results from the 4-factor solution with a-value =0.3. Gray bars represent standard HOA spectrum (Ng et al., 2011)

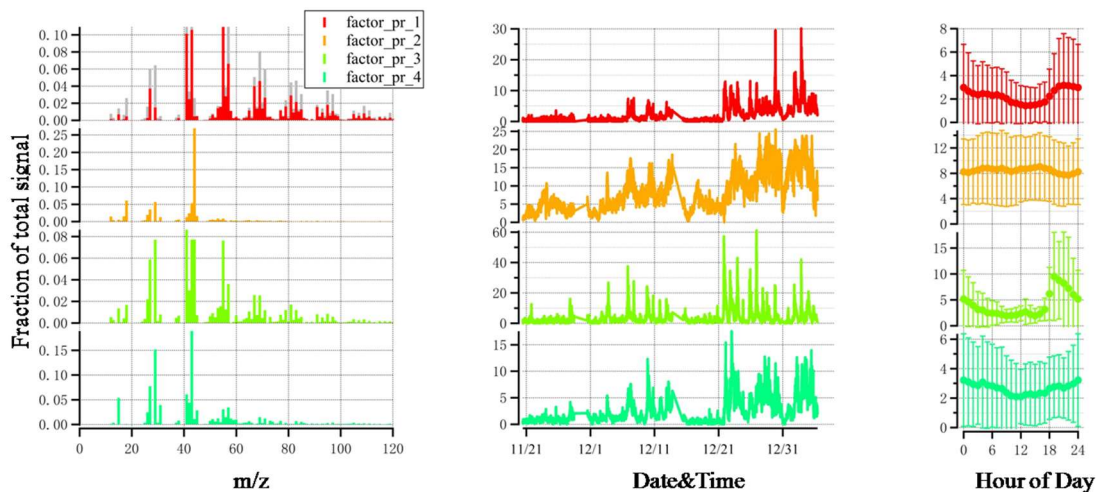

Figure S9. Results from the 4-factor solution with a-value =0.5. Gray bars represent standard HOA spectrum (Ng et al., 2011)

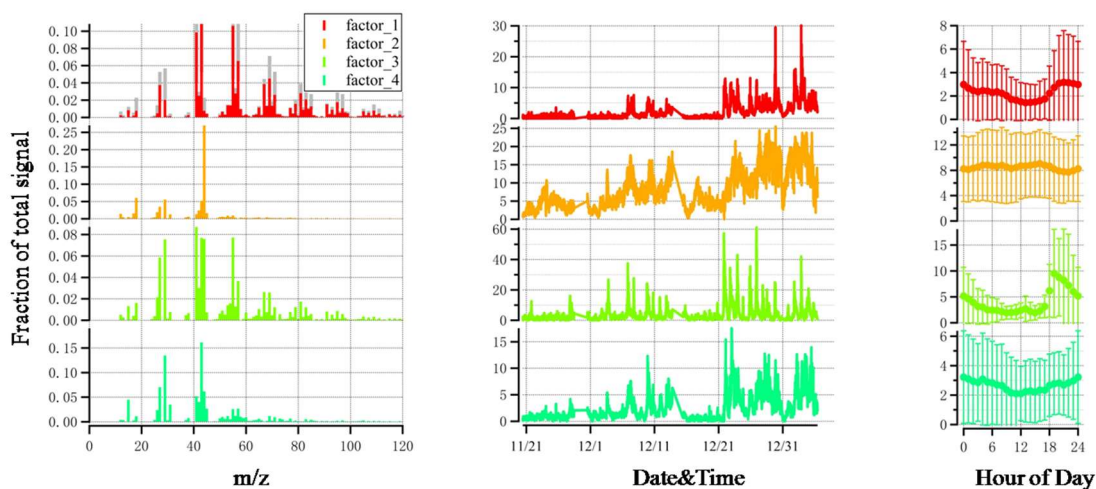

Figure S10. Results from the 4-factor solution with a-value =0.7. Gray bars represent standard HOA spectrum (Ng et al., 2011)



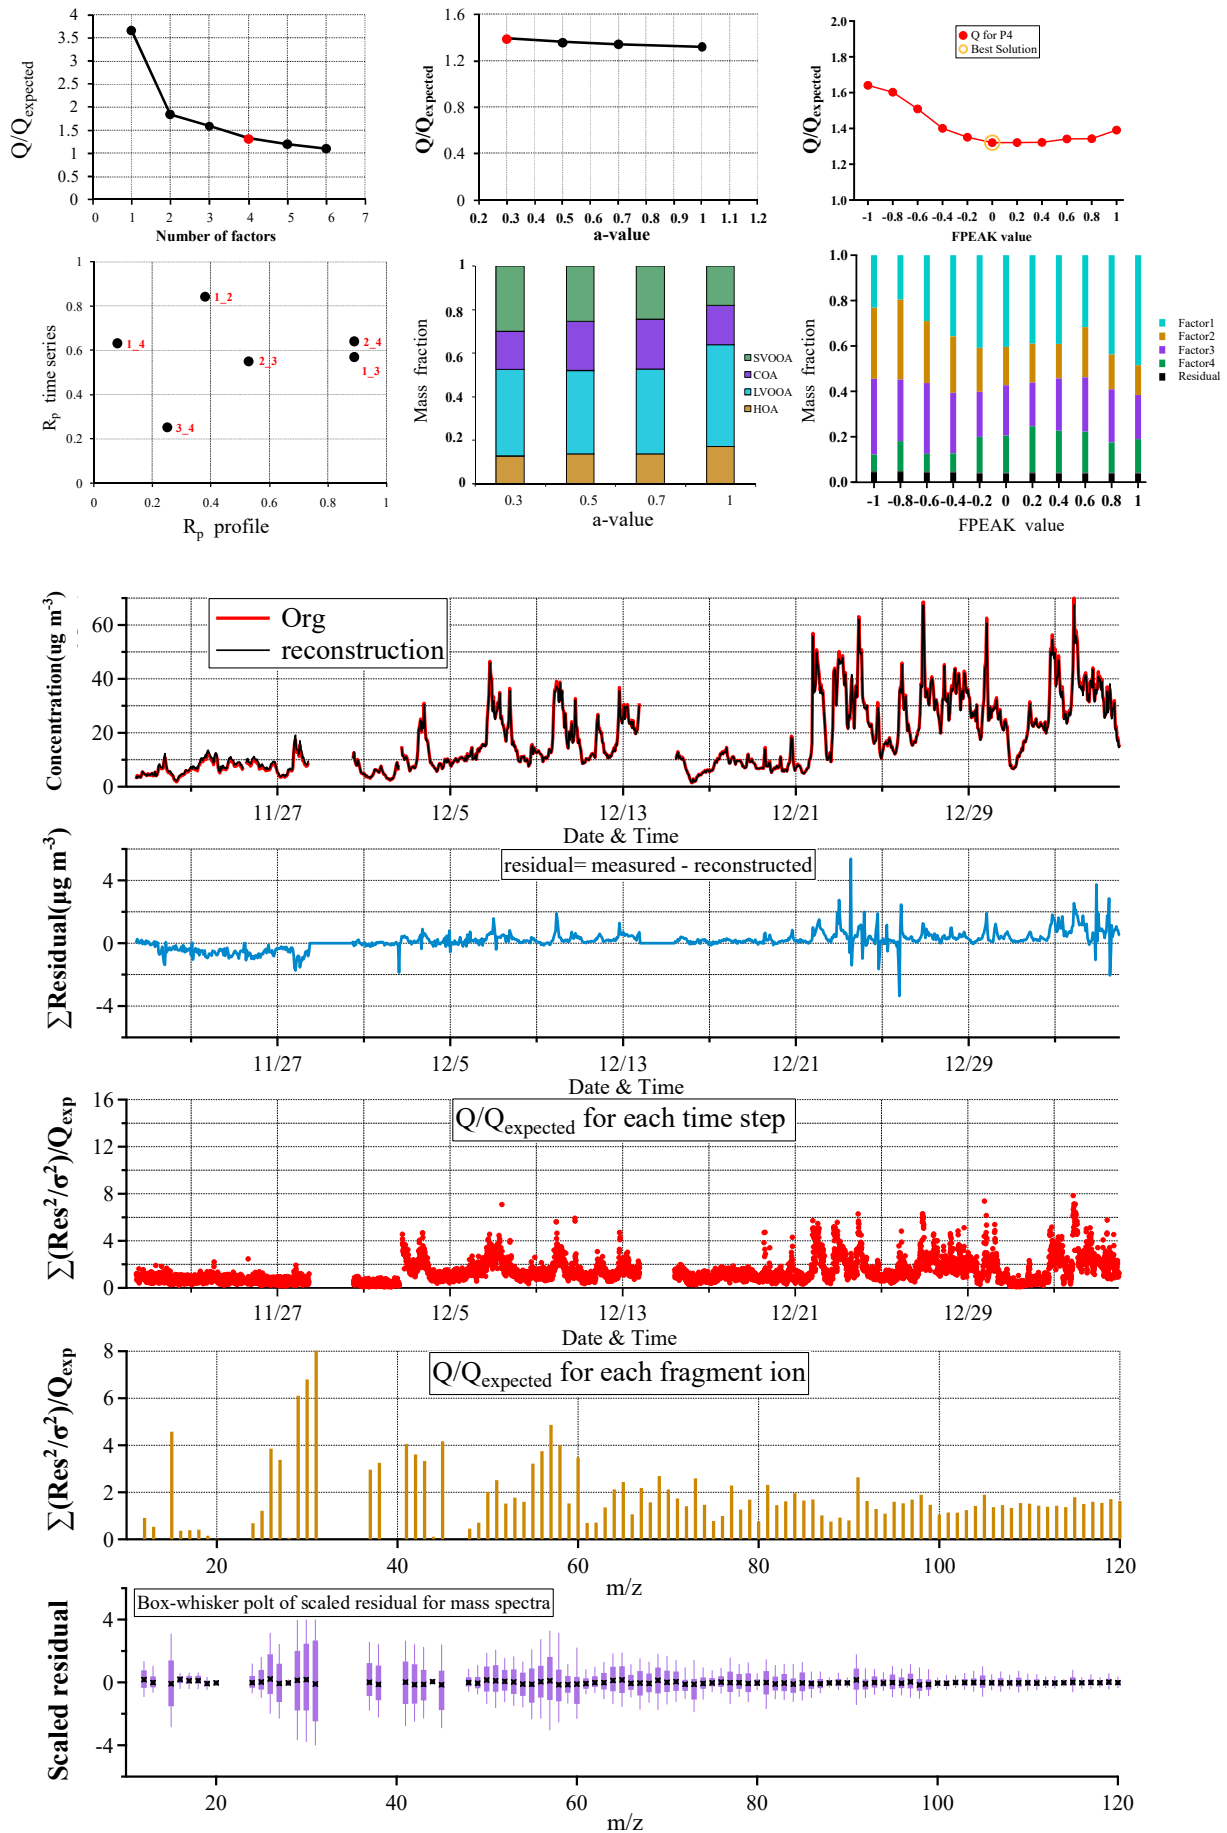

Figure S11. ME-2 diagnostics for the 4 factor solution with  $a$ -value=0.3 (the chosen optimal solution)

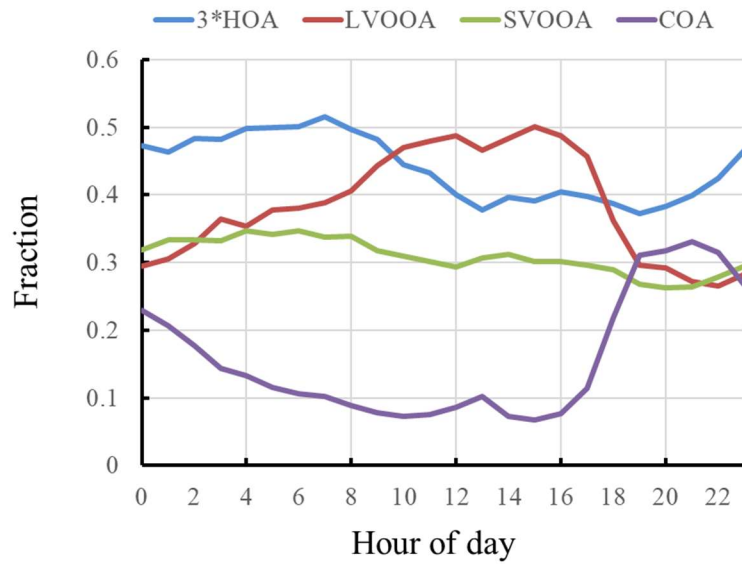

**Figure S12.** The diurnal fractions of 4 OA components for pollution EPs.

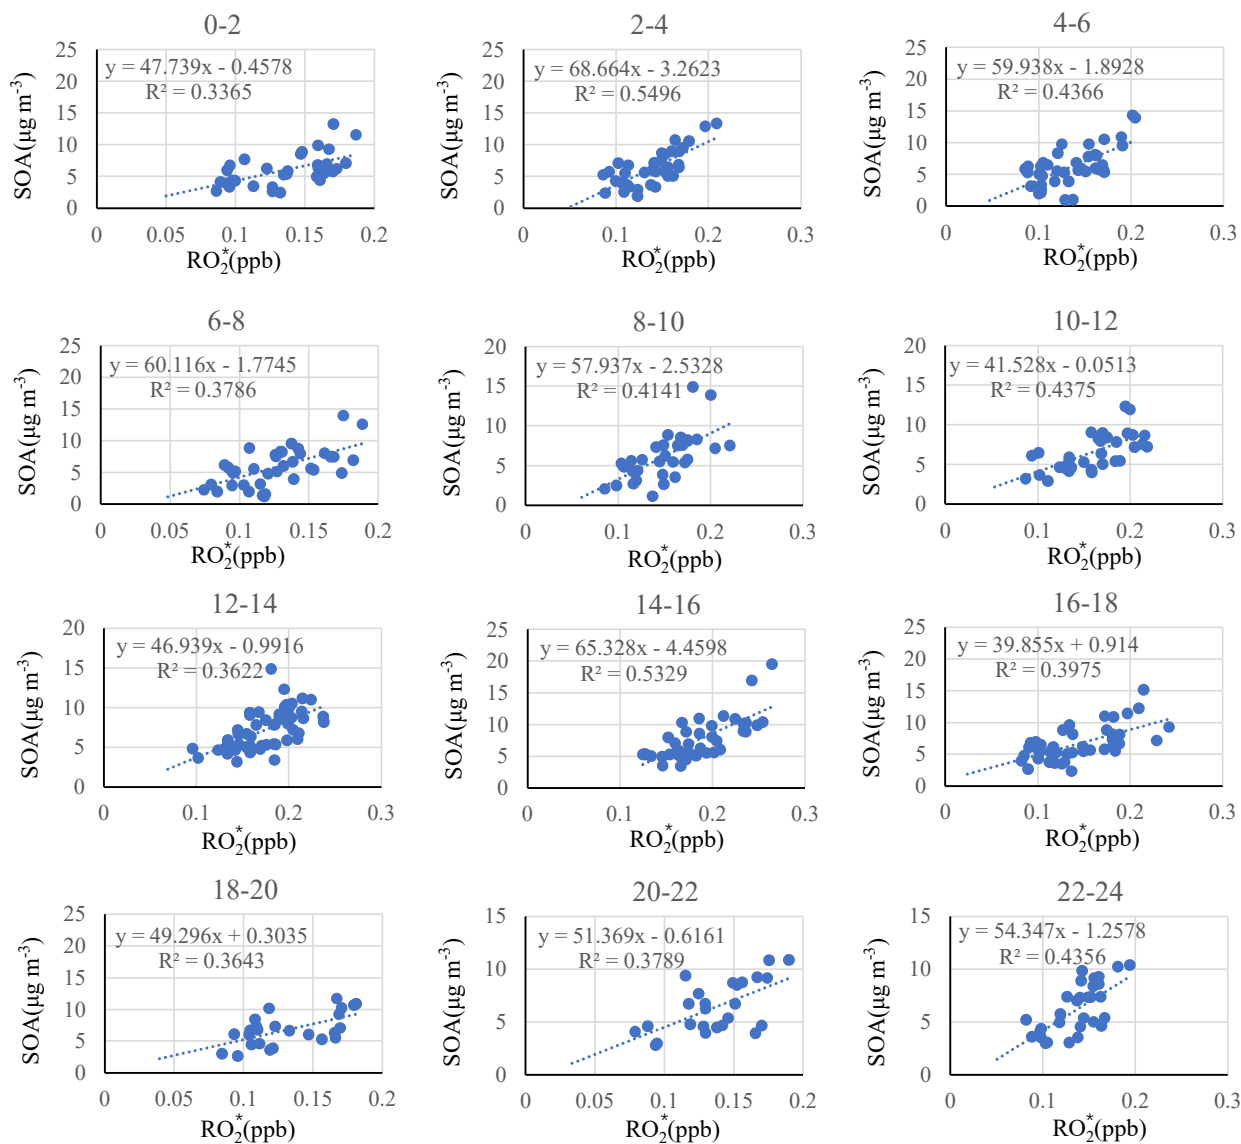

**Figure S13.** Dependence of SOA on  $\text{RO}_2^*$  concentration for the same short period of every day (i.e., every 2 hours) during non-pollution periods. Note that all the correlations are statistically significant ( $p$ -value  $< 0.01$ ).

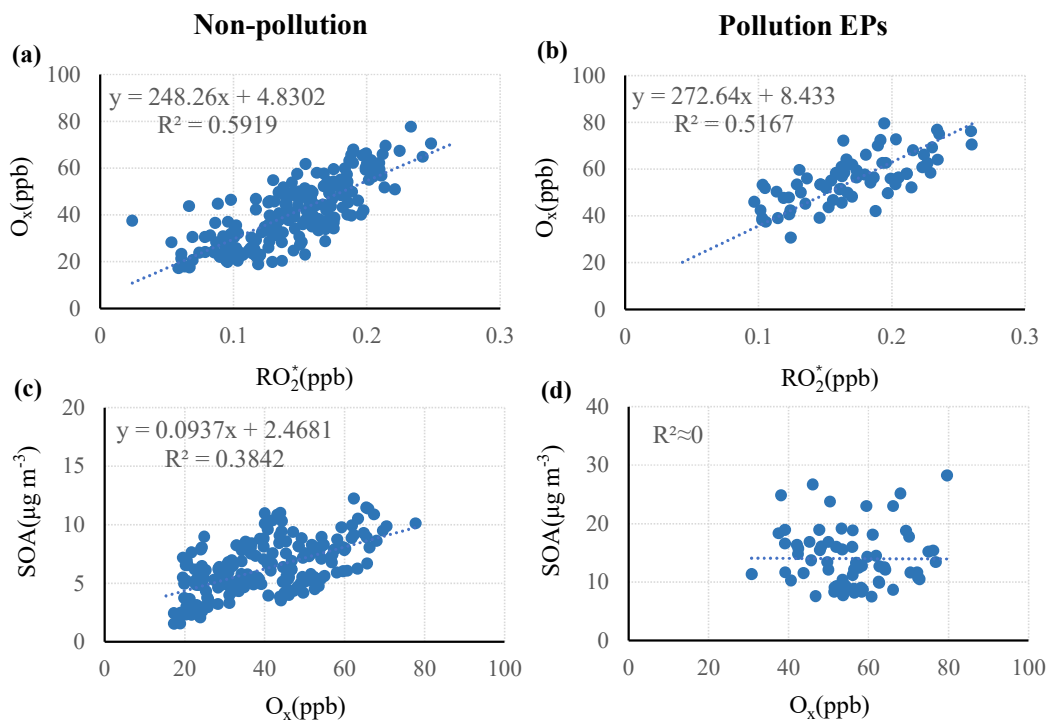

**Figure S14.** Daytime dependence of  $O_x$  on  $RO_2^*$  (a, b) and dependence of SOA on  $O_x$  (c,d) for pollution EPs and non-pollution period.

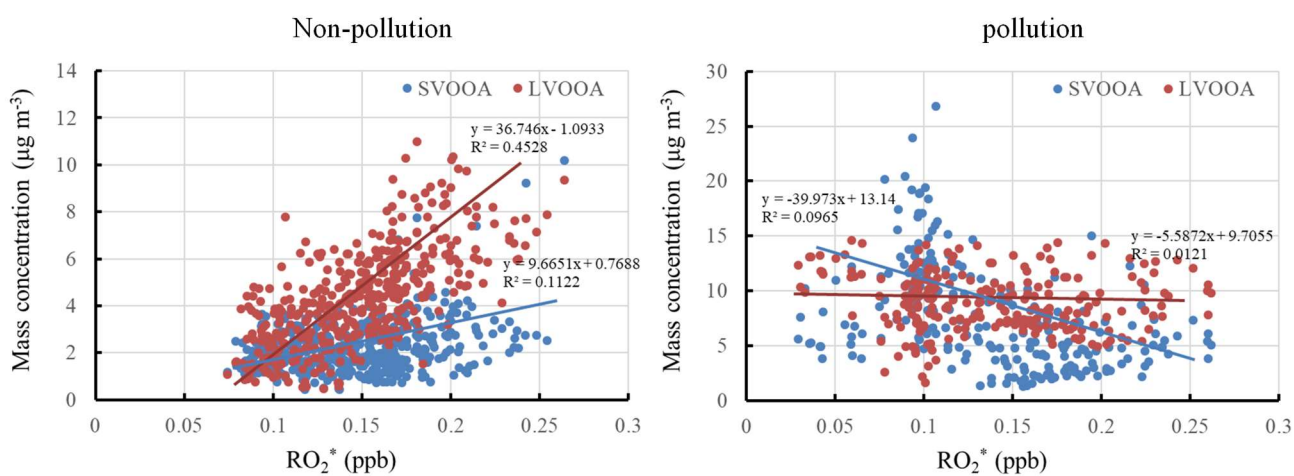

**Figure S15.** Scatter plots between  $RO_2^*$  and SVOOA/LVOOA for non-pollution period and pollution EPs.

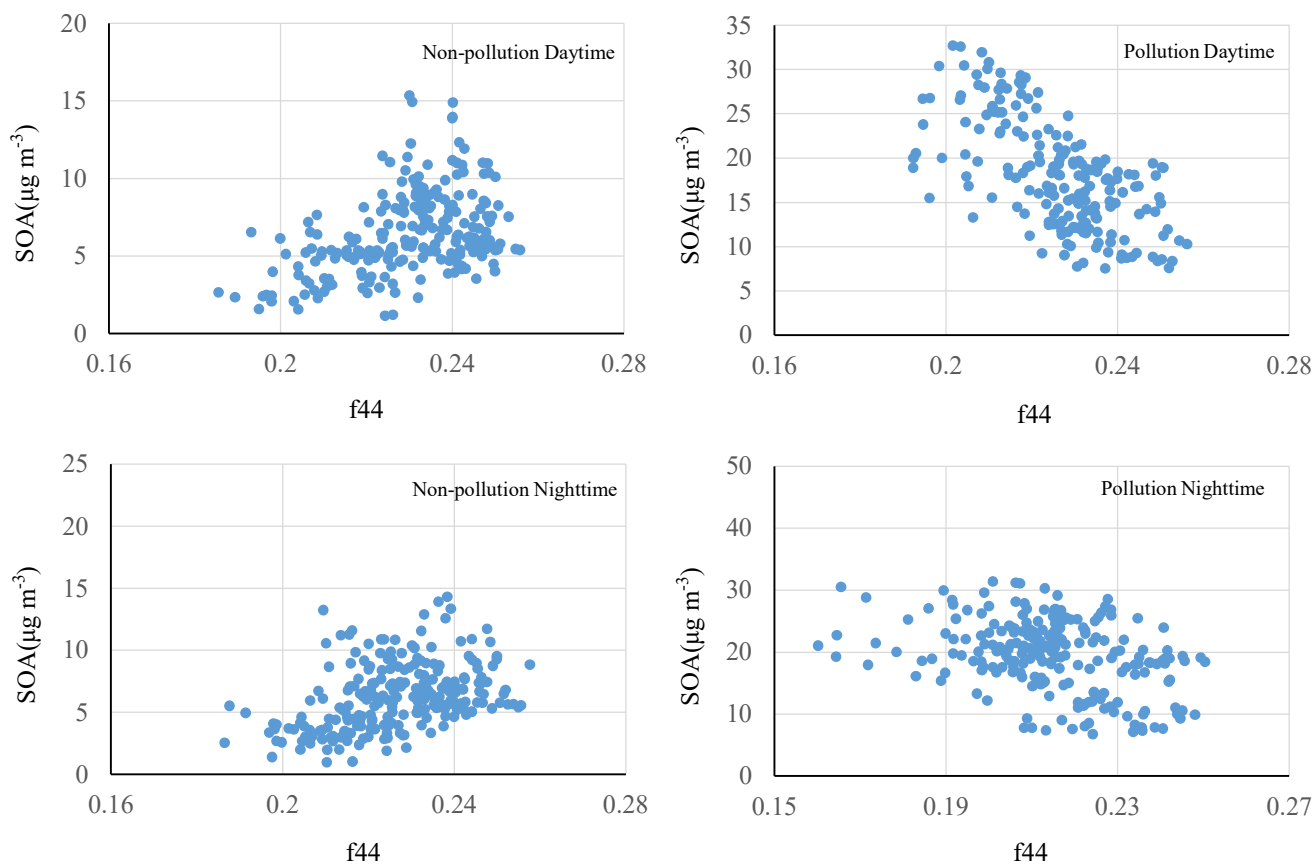

**Figure S16.** Scatter plots between SOA and  $f_{44}$  for different scenarios (non-pollution daytime, non-pollution nighttime, pollution daytime and pollution night time).

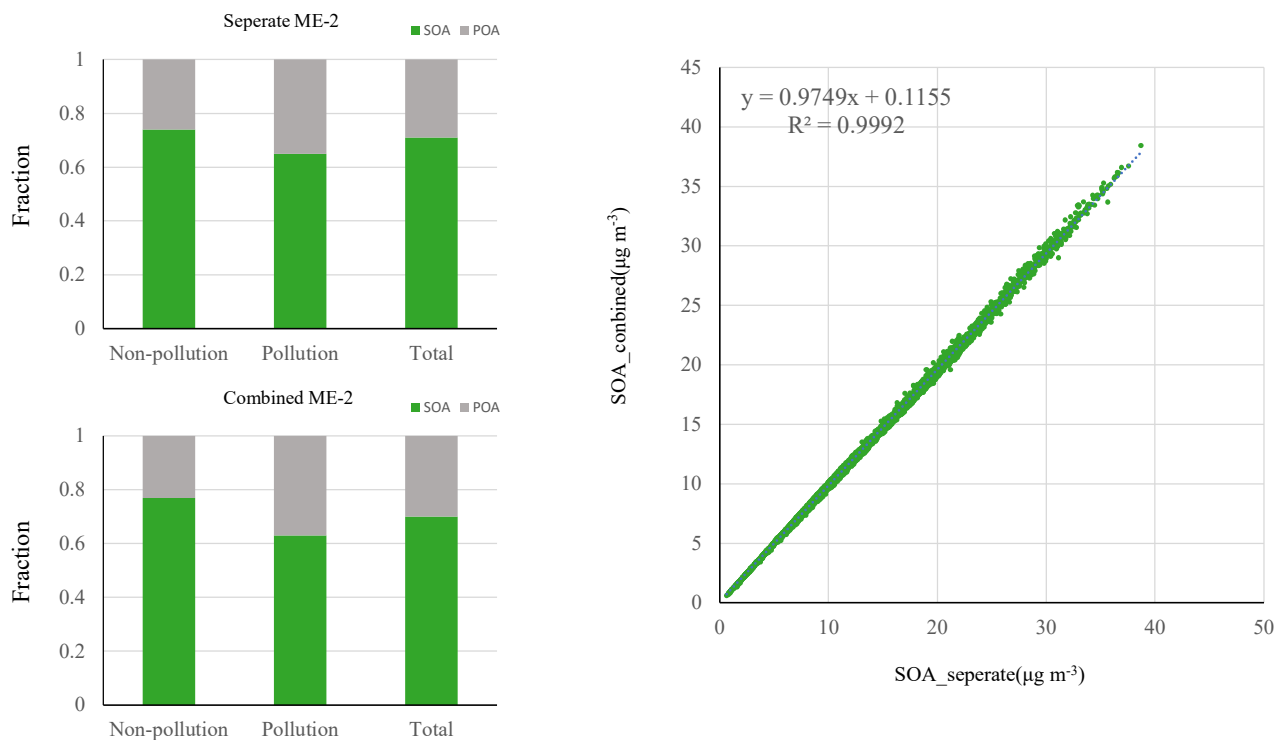

**Figure S17.** Comparison between combined ME-2 and separate ME-2, along with their correlation.

## References

- Canonaco, F., Crippa, M., Slowik, J. G., Baltensperger, U., and Prévôt, A. S. H.: SoFi, an IGOR-based interface for the efficient use of the generalized multilinear engine (ME-2) for the source apportionment: ME-2 application to aerosol mass spectrometer data, *Atmospheric Measurement Techniques*, 6, 3649-3661, 10.5194/amt-6-3649-2013, 2013.
- Cheng, Y., Engling, G., He, K. B., Duan, F. K., Ma, Y. L., Du, Z. Y., Liu, J. M., Zheng, M., and Weber, R. J.: Biomass burning contribution to Beijing aerosol, *Atmospheric Chemistry and Physics*, 13, 7765-7781, 10.5194/acp-13-7765-2013, 2013.
- Ng, N. L., Canagaratna, M. R., Jimenez, J. L., Zhang, Q., Ulbrich, I. M., and Worsnop, D. R.: Real-Time Methods for Estimating Organic Component Mass Concentrations from Aerosol Mass Spectrometer Data, *Environmental Science & Technology*, 45, 910-916, 10.1021/es102951k, 2011.
- Paatero, P., and Hopke, P. K.: Rotational tools for factor analytic models, *Journal of Chemometrics*, 23, 91-100, 10.1002/cem.1197, 2009.
- Qin, Y. M., Tan, H. B., Li, Y. J., Schurman, M. I., Li, F., Canonaco, F., Prévôt, A. S. H., and Chan, C. K.: Impacts of traffic emissions on atmospheric particulate nitrate and organics at a downwind site on the periphery of Guangzhou, China, *Atmospheric Chemistry and Physics*, 17, 10245-10258, 10.5194/acp-17-10245-2017, 2017.
- Ulbrich, I. M., Canagaratna, M. R., Zhang, Q., Worsnop, D. R., and Jimenez, J. L.: Interpretation of organic components from Positive Matrix Factorization of aerosol mass spectrometric data, *Atmos. Chem. Phys.*, 9, 2891-2918, 10.5194/acp-9-2891-2009, 2009.
- Zhang, Q., Jimenez, J. L., Canagaratna, M. R., Ulbrich, I. M., Ng, N. L., Worsnop, D. R., and Sun, Y.: Understanding atmospheric organic aerosols via factor analysis of aerosol mass spectrometry: a review, *Analytical and bioanalytical chemistry*, 401, 3045-3067, 10.1007/s00216-011-5355-y, 2011.
- Zhang, Y., Sun, J., Zhang, X., Shen, X., Wang, T., and Qin, M.: Seasonal characterization of components and size distributions for submicron aerosols in Beijing, *Science China Earth Sciences*, 56, 890-900, 10.1007/s11430-012-4515-z, 2012.
